# Supplementary material for: SWATH label-free proteomics analyses revealed the roles of oxidative stress and antioxidant defensing system in sclerotia formation of Polyporus umbellatus
Source: PubMed Central journal article supplement (PMC5278369; doi:10.1038/srep41283), 2017-01-30
Supplement: srep41283-s2.pdf [file srep41283-s2.pdf]

**SWATH label-free proteomics analyses revealed the roles of oxidative stress and antioxidant  
defensing system in sclerotia formation of *Polyporus umbellatus***

Bing Li<sup>1</sup>, Xiaofang Tian<sup>2</sup>, Chunlan Wang<sup>1</sup>, Xu Zeng<sup>1</sup>, Yongmei Xing<sup>1</sup>, Hong Ling<sup>1</sup>, Wanqiang Yin<sup>3</sup>,

Lixia Tian<sup>1</sup>, Zhixia Meng<sup>1</sup>, Jihui Zhang<sup>4,\*</sup>, Shunxing Guo<sup>1,\*\*</sup>

(1. Institute of Medicinal Plant Development, Chinese Academy of Medical Sciences & Peking  
Union Medical College, Beijing 100193 P. R. China

2. Pharmaceutical department of China-Japan Friendship Hospital, Beijing 100029 P. R. China

3. Tianjin University of Science & Technology, Tianjin 300457, P. R. China

4. State Key Laboratory of Microbial Resources, Institute of Microbiology, Chinese Academy of  
Sciences, Beijing 100101, P. R. China)

Table S2. Proteins information and relative ratio of peak area that related with oxidative stress, glycolysis and cell wall adhesion

| ID                | Name   | Catalytic funtion                                                    | Relative ratio of area                                                                                                         |       |       |       |       |       |      |
|-------------------|--------|----------------------------------------------------------------------|--------------------------------------------------------------------------------------------------------------------------------|-------|-------|-------|-------|-------|------|
|                   |        |                                                                      | IS/IH                                                                                                                          | DS/DH | MS/MH | DS/IS | MS/DS | MS/IS |      |
| Respirotary chain | Q9UTJ7 | succinate dehydrogenase (SDH) [ubiquinone] flavoprotein subunit (FP) | Succinate + a quinone = fumarate + a quinol                                                                                    | 0.58  | -     | -     | 1.59  | -     | 1.77 |
|                   | P32420 | Succinate dehydrogenase (SDH) [ubiquinone] iron-sulfur subunit       | Succinate + a quinone = fumarate + a quinol                                                                                    | 0.60  | -     | -     | 2.15  | -     | 2.18 |
|                   | Q5Y223 | electron transfer flavoprotein subunit alpha                         | serves as a specific electron acceptor for several dehydrogenases                                                              | 0.65  | -     | -     | -     | -     | -    |
|                   | Q6ING7 | FAD synthase                                                         | ATP + FMN = diphosphate + FAD                                                                                                  | 1.72  | 1.53  | -     | 1.41  | 0.49  | -    |
|                   | Q24751 | ATP synthase subunit beta                                            | ATP + H <sub>2</sub> O + H <sup>+</sup> (In) = ADP + phosphate + H <sup>+</sup> (Out)                                          | 0.61  | 0.61  | -     | -     | -     | -    |
|                   | G2TRP6 | Cytochrome c oxidase subunit 6B-like protein                         | 4 ferrocycytochrome c + O <sub>2</sub> + 4H <sup>+</sup> = 4 ferricytochrome c + 2 H <sub>2</sub> O                            | 1.81  | 1.21  | 2.00  | -     | -     | -    |
| TCA cycle         | O13302 | Isocitrate dehydrogenase [NAD] subunit 1 (IDH1)                      | Isocitrate + NAD <sup>+</sup> = 2-oxoglutarate + CO <sub>2</sub> + NADH+H <sup>+</sup>                                         | 0.62  | -     | -     | -     | -     | -    |
|                   | Q9USP8 | Isocitrate dehydrogenase [NAD] subunit 2 (IDH2)                      | Isocitrate + NAD <sup>+</sup> = 2-oxoglutarate + CO <sub>2</sub> + NADH                                                        | 0.52  | 0.56  | -     | -     | -     | -    |
|                   | P51174 | Long-chain specific acyl-CoA dehydrogenase                           | Long-chain-acyl-CoA + electron-transfer flavoprotein = long-chain-2,3-dehydroacyl-CoA + reduced electron-transfer flavoprotein | 0.66  | 1.83  | 0.58  | 1.81  | -     | 1.80 |
| Glycolysis/       | O00087 | Dihydrolipoyl dehydrogenase                                          | N(6)-(dihydrolipoyl)lysine +                                                                                                   | 0.58  | 0.56  | -     | -     | -     | -    |

|                                                         |                                    |                                                              |                                                                                                          |      |      |      |      |      |      |
|---------------------------------------------------------|------------------------------------|--------------------------------------------------------------|----------------------------------------------------------------------------------------------------------|------|------|------|------|------|------|
| gluconeogenesis<br>or<br>Biosynthesis<br>of antibiotics |                                    |                                                              | $\text{NAD}^+ = \text{protein N(6)-(lipoyl)lysine} + \text{NADH}$                                        |      |      |      |      |      |      |
|                                                         | Q5KPI5                             | Acetolactate synthase                                        | $2\text{-pyruvate} = 2\text{-acetolactate} + \text{CO}_2$                                                | 0.32 | -    | 0.50 | 1.77 | 0.56 |      |
|                                                         | O94123                             | Phosphoglycerate kinase                                      | $\text{ATP} + 3\text{-phospho-D-glycerate} = \text{ADP} + 3\text{-phospho-D-glyceroyl phosphate}$        | 1.50 | -    | -    | 0.63 | -    | 0.44 |
|                                                         | Q2RLT9                             | 2, 3-bisphosphoglycerate-independent phosphoglycerate mutase | $2\text{-phospho-D-glycerate} = 3\text{-phospho-D-glycerate}$                                            | 1.53 | -    | -    | 0.61 | -    | 0.58 |
|                                                         | P08157                             | Aldehyde dehydrogenase                                       | $\text{An aldehyde} + \text{NAD}^+ + \text{H}_2\text{O} = \text{a carboxylate} + \text{NADH}$            | 0.62 | 0.52 | -    | -    | -    | 1.50 |
|                                                         | Q96UH7                             | Fructose-bisphosphate aldolase 1                             | $\text{D-fructose 1, 6-bisphosphate} = \text{glycerone phosphate} + \text{D-glyceraldehyde 3-phosphate}$ | 1.58 | -    | -    | -    | -    | -    |
|                                                         | Q91XL3                             | UDP-glucuronic acid decarboxylase 1                          | $\text{UDP-D-glucuronate} = \text{UDP-D-xylose} + \text{CO}_2$                                           | 2.61 | 0.52 | -    | 0.25 | 1.47 | 0.37 |
|                                                         | P11883                             | Aldehyde dehydrogenase                                       | $\text{An aldehyde} + \text{NAD(P)}^+ + \text{H}_2\text{O} = \text{a carboxylate} + \text{NAD(P)H}$      | 0.63 | -    | 0.57 | 1.94 | 0.18 | 0.35 |
|                                                         | P54114                             | Aldehyde dehydrogenase [NAD(P)+] 2                           | $\text{An aldehyde} + \text{NAD}^+ + \text{H}_2\text{O} = \text{a carboxylate} + \text{NADH}$            | 2.15 | -    | -    | 0.26 | 1.69 | 0.45 |
|                                                         | Q9P7K9                             | Aldehyde dehydrogenase-like protein C21C3                    | $2\text{-phospho-D-glycerate} = 3\text{-phospho-D-glycerate}$                                            | 0.30 | -    | -    | 1.71 | -    | -    |
|                                                         | P27800                             | Aldehyde reductase 1                                         | $\text{An alcohol} + \text{NADP}^+ = \text{an aldehyde} + \text{NADPH} + \text{H}^+$                     | 2.06 | -    | 0.55 | 0.61 | -    | -    |
|                                                         | Q01752                             | Aryl-alcohol dehydrogenase [NADP(+)]                         | $\text{An aromatic alcohol} + \text{NADP}^+ = \text{an aromatic aldehyde} + \text{NADPH}$                | 0.48 | 0.39 | -    | -    | -    | -    |
| Q99LB2                                                  | Dehydrogenase/reductase SDR family | $\text{an alcohol} + \text{NAD(P)}^+ = \text{an}$            | 0.55                                                                                                     | -    | -    | 1.67 | 1.90 | 3.17 |      |

|               |        |                        |                                                                                                 |      |      |      |      |      |      |
|---------------|--------|------------------------|-------------------------------------------------------------------------------------------------|------|------|------|------|------|------|
|               |        | member 4               | aldehyde + NAD(P)H + H <sup>+</sup>                                                             |      |      |      |      |      |      |
|               | A3RF36 | Aldehyde dehydrogenase | An aldehyde + NAD(P) <sup>+</sup> + H <sub>2</sub> O = a carboxylate + NAD(P)H + H <sup>+</sup> | 0.45 | 2.45 | 1.91 | 1.83 | 0.51 | -    |
| Cell adhesion | P04158 | Hydrophobin SC1        | Contributes to surface hydrophobicity                                                           | 0.21 | 0.31 | 0.28 | 5.25 | 1.89 | 9.93 |
|               | O43122 | Hydrophobin B          | Contributes to the structural integrity of a cell wall                                          | 0.26 | -    | 0.49 | 3.90 | -    | 4.44 |
|               | P16933 | Hydrophobin SC3        | Contributes to surface hydrophobicity                                                           | 3.25 | 3.70 | 3.43 | 1.32 | 0.22 | 0.29 |

Note: “-”- ratio was between 0.67 and 1.50, there was no significant difference

## Supplemental Figures

Fig.S1

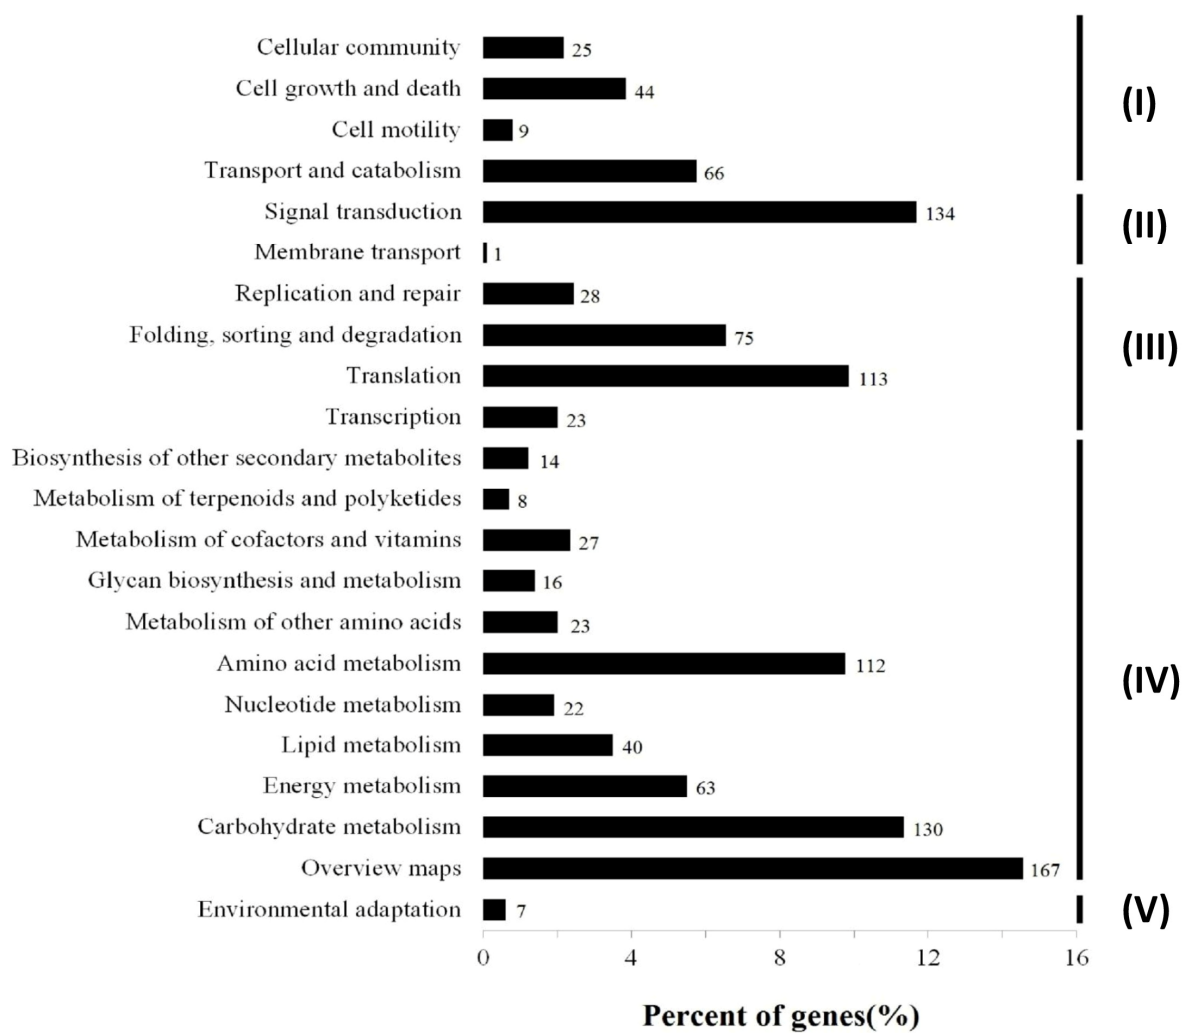

Fig.S1 KEGG metabolic pathway analyses of all quantified proteins.

Fig.S2

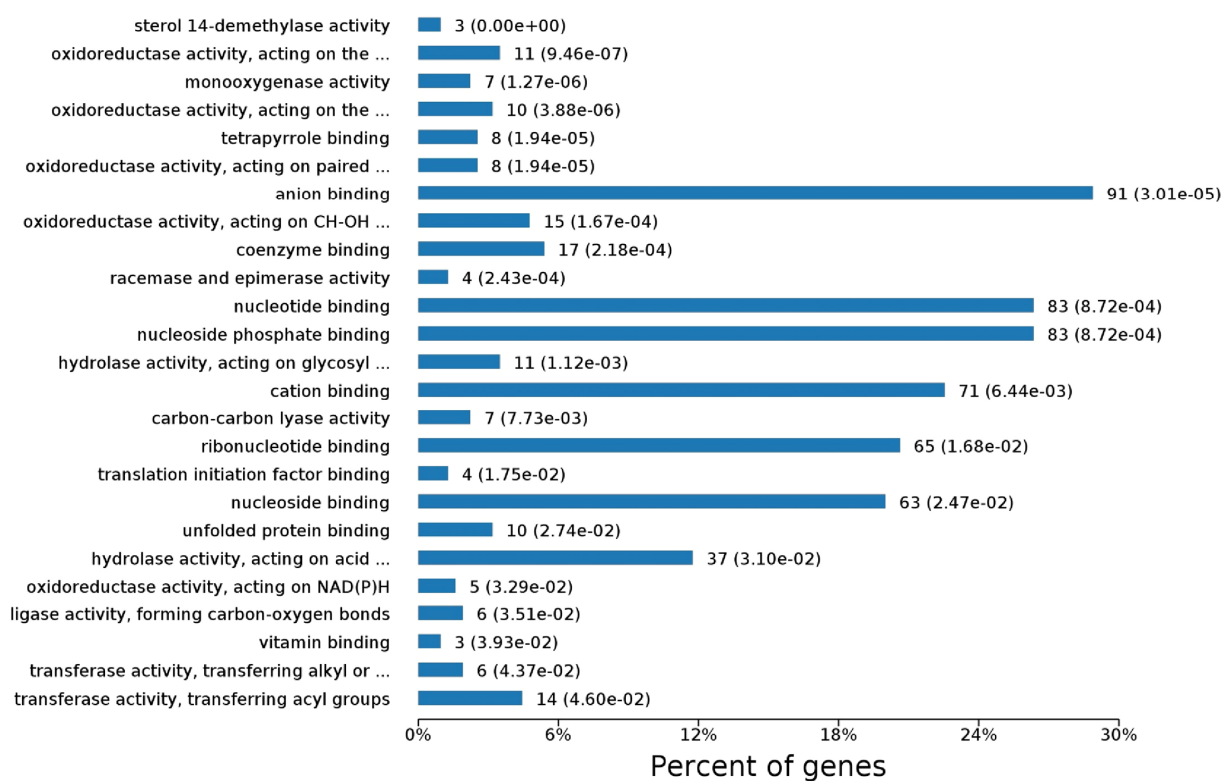

Fig.S2 Molecular Function of GO annotation for differentially expressed proteins between sclerotia and hyphae at initial phase.

Fig.S3

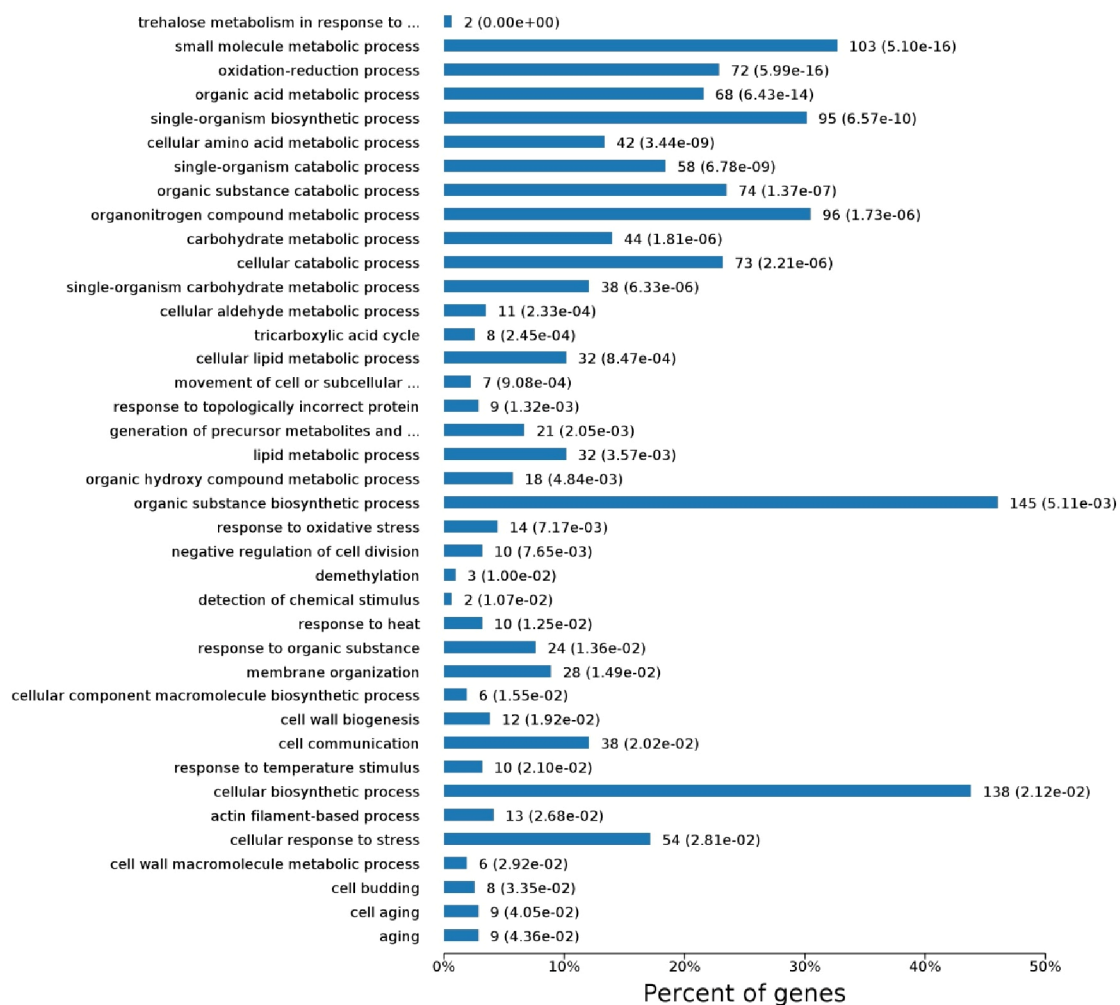

Fig.S3 Biological Process of GO annotation for differentially expressed proteins between sclerotia and hyphae at initial phase.

Fig.S4

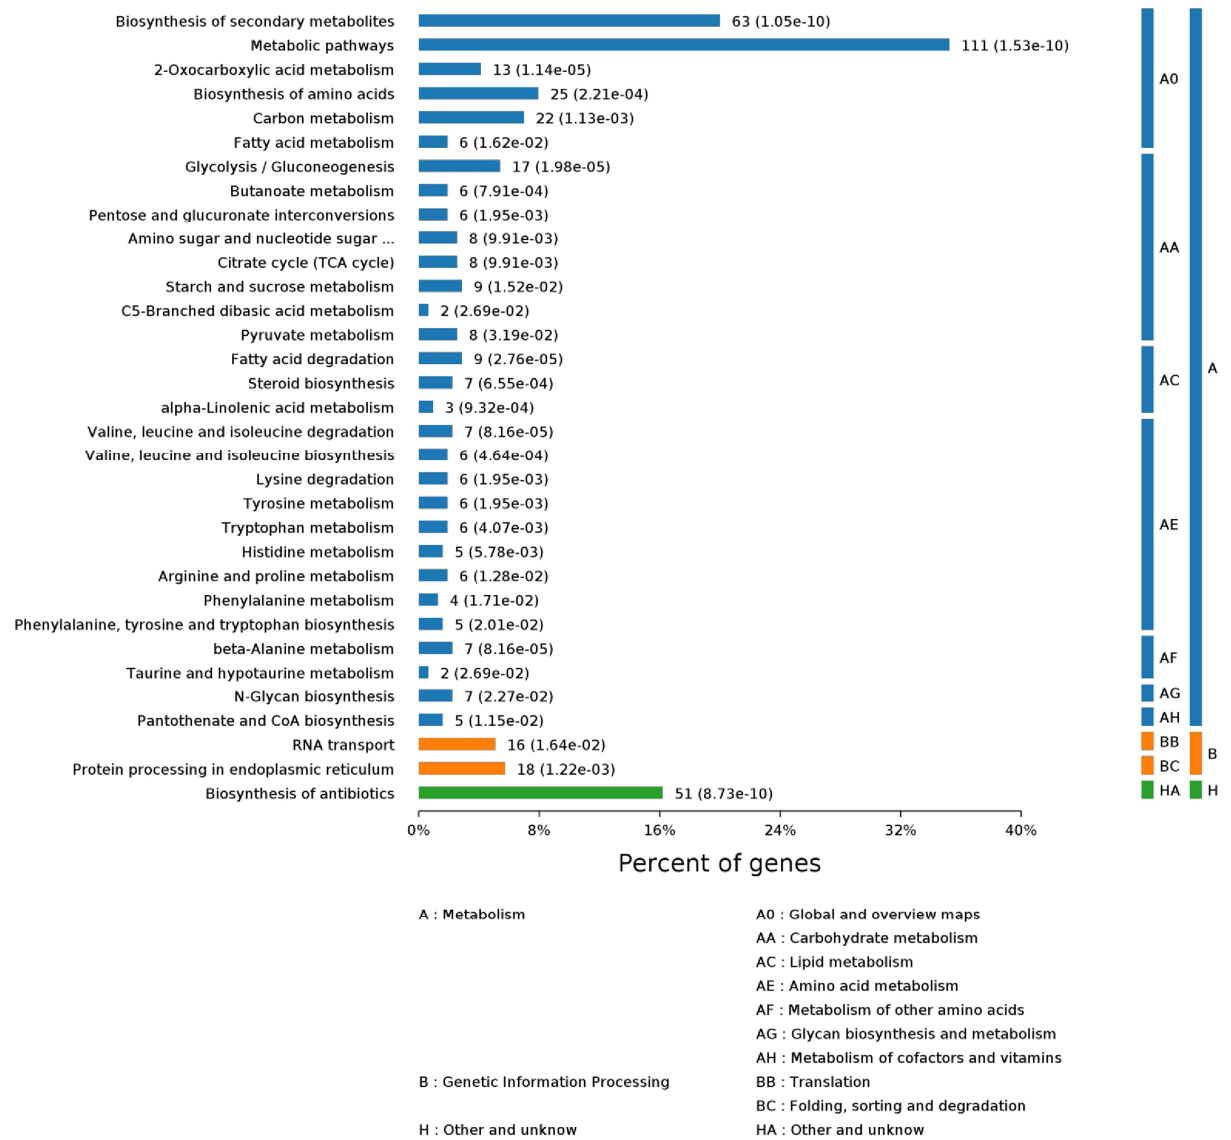

Fig.S4 KEGG metabolic pathway analyses of differentially expressed proteins between sclerotia and hyphae at initial phase.
